# Supplementary material for: Quantifying uncertainty on sediment loads using bootstrap confidence intervals
Source: Copernicus journal article supplement (doi:10.5194/hess-2016-264), 2016-06-21
Supplement: Supplementary file 1 [file hess-2016-264-supplement.pdf]

## Supplement to: Quantifying uncertainty on sediment loads using bootstrap confidence intervals

Johanna I.F. Slaets<sup>1</sup>, Hans-Peter Piepho<sup>2</sup>, Petra Schmitter<sup>3</sup>, Thomas Hilger<sup>1</sup>, Georg Cadisch<sup>1</sup>

<sup>1</sup> Institute of Plant Production and Agroecology in the Tropics and Subtropics, University of Hohenheim, Garbenstrasse 13, 70599 Stuttgart, Germany

<sup>2</sup> Biostatistics Unit, Institute of Crop Science, University of Hohenheim, Fruwirthstrasse 23, 70599 Stuttgart, Germany

<sup>3</sup> The International Water Management Institute, Nile Basin and East Africa Office, Addis Ababa, Ethiopia

*Correspondence to:* Johanna I.F. Slaets, Institute of Plant Production and Agroecology in the Tropics and Subtropics, University of Hohenheim, Garbenstrasse 13, 70599 Stuttgart, Germany. (hanna.slaets@gmail.com)

The objective is to simulate pairs of discharge (Q) and water level (h) that result in a stage-discharge rating curve with a fixed realized  $R^2$  (for example, 95%). We develop the theoretical framework and provide code in SAS to obtain this result.

```
/*
In the original dataset, Q is discharge and h is the water height.
Simulate a dataset of log(Q) and log(h) that:
-has the same size as the original dataset (i=1 to n_original)
-is simulated from the original stage-discharge equation (enter
parameters for logQ=a*logh + b)
-has residual errors drawn randomly for a normal distribution with any
variance, as the variance will be rescaled later
*/

data Q_simset;
do i=1 to 20;
  logh=-1.0727485+4.1546429*rannor(-1);
  logQ_perf=0.0466*logh + 0.1254;
  logQ=logQ_perf+ (0.1*rannor(-1));
  *add any variance, then rescale;
  output;
end;
run;

/*
This simulated dataset is the input dataset for the macro which
rescales the errors so we obtain the desired R-square.
The macro variables are
```

```

sim= the simulated dataset from the first step
Rsquare_desired= the required R2, for example 0.95
*/
%macro Rsquare(sim=, Rsquare_desired=);

    proc mixed data=&sim;
    model logQ1= logp1 /outpm=pred;
    run;
    quit;

    data pred;
    set pred;
    resid_sq=resid**2;
    run;

    proc univariate data=pred noprint;
    var resid resid_sq logQ1 pred;
    output out=sum_resid sum=sum_resid sum_resid_sq sumQ1 sumpred
    mean=mean_resid mean_resid_sq mean_logQ1 mean_pred;
    run;

    data sum_resid;
    set sum_resid;
    call symput('SS_resid',trim(left(sum_resid_sq)));
    call symput('mean_resid',trim(left(mean_resid)));
    call symput('mean_logQ1',trim(left(mean_logQ1)));
    call symput('mean_pred',trim(left(mean_pred)));
    run;

    data data_sim;
    set pred;
    z2_pred=(pred-&mean_pred);
    z2_err=(resid-&mean_resid);
    run;

    data data_sim;
    set data_sim;
    z1_calc=(pred-&mean_pred)**2;
    z2_calc=z2_pred*z2_err;
    z3_calc=(resid-&mean_resid)**2;
    run;

    proc univariate data=data_sim noprint;
    var z1_calc z2_calc z3_calc;
    output out=explained_error sum=sum_z1 sum_z2 sum_z3;
    run;

    data explained_error;
    set explained_error;
    z1=sum_z1;
    z2=2*sum_z2;
    z3=sum_z3;
    run;

    data explained_error;
    set explained_error;

```

```

call symput('z1',trim(left(z1)));
call symput('z2',trim(left(z2)));
call symput('z3',trim(left(z3)));
run;

*solve for c:  $Ac^2 + bc + C = 0$  with
C= (Rsquare_desired-1)*z1
B= (Rsquare_desired-1)*z2
A= SSe + (Rsquare_desired-1)*z3

-> solution
x1,2= ( -B +/- Sqrt( B**2 - 4*A*C) ) / (2*A)
;

data rescale;
set explained_error;
A= &SS_resid + ((&Rsquare_desired-1)*&z3);
B= (&Rsquare_desired-1)*&z2;
C= (&Rsquare_desired-1)*&z1;
run;

data rescale;
set rescale;
D=(B**2) - (4*A*C);
run;

data rescale;
set rescale;
sqrtD=sqrt(D);
run;

data rescale;
set rescale;
c1= (-B + sqrtD)/(2*A);
c2= (-B - sqrtD)/(2*A);
run;

data rescale;
set rescale;
call symput('c1',trim(left(c1)));
call symput('c2',trim(left(c2)));
run;

data data_sim;
set data_sim;
c1=&c1;
c2=&c2;
SS_error=&SS_resid;
run;

data data_sim;
set data_sim;
resid_rescaled1=c1*resid;
resid_rescaled2=c2*resid;
run;

```

```

data data_sim;
set data_sim;
logQ1_new_1=pred+resid_rescaled1;
logQ1_new_2=pred+resid_rescaled2;
run;

data data_sim;
set data_sim;
keep logQ1_new_1 logQ1_new_2 logp1;
run;

%mend;

%Rsquare(sim=Q_simset, Rsquare_desired=0.95);

/*
The final dataset is called data_sim.
As there are two distinct solutions, there are two rescaled variables
that both give the desired Rsquare:
logQ_new_1 and logQ_new_2
The desired Rsquare can be demonstrated in PROC GLM
*/

proc glm data=data_sim;
model logQ_new_1=logh;
run;
quit;

proc glm data=data_sim;
model logQ_new_2=logh;
run;

```
